# Supplementary material
Source: Research Square preprint supplement (doi:10.21203/rs.3.rs-9095841/v1)
Supplement: Supplementary file 1 [file 2351a5dec1b4144bd5ebab25.pdf]

## Consolidated criteria for reporting qualitative research (COREQ): a 32-item checklist for interviews and focus groups

Developed from: Tong A., Sainsbury P., Craig J. Consolidated criteria for reporting qualitative research (COREQ): a 32-item checklist for interviews and focus groups, *IJQHC* 2007;19(6),349–357.

<https://doi.org/10.1093/intqhc/mzm042>

| Topic                                          | Item no. | Guide questions/description                                                                                                                              | Reported on page no. |
|------------------------------------------------|----------|----------------------------------------------------------------------------------------------------------------------------------------------------------|----------------------|
| <b>Domain 1: Research team and reflexivity</b> |          |                                                                                                                                                          |                      |
| <i>Personal Characteristics</i>                |          |                                                                                                                                                          |                      |
| Interviewer/facilitator                        | 1        | Which author/s conducted the interview or focus group?                                                                                                   | Page 10              |
| Credentials                                    | 2        | What were the researcher's credentials? E.g. PhD, MD                                                                                                     | Page 25              |
| Occupation                                     | 3        | What was their occupation at the time of the study?                                                                                                      | Page 25              |
| Gender                                         | 4        | Was the researcher male or female?                                                                                                                       | Page 25              |
| Experience and training                        | 5        | What experience or training did the researcher have?                                                                                                     | Page 11              |
| <i>Relationship with participants</i>          |          |                                                                                                                                                          |                      |
| Relationship established                       | 6        | Was a relationship established prior to study commencement?                                                                                              | Page 10              |
| Participant knowledge of the interviewer       | 7        | What did the participants know about the researcher? e.g. personal goals, reasons for doing the research                                                 | Page 6               |
| Interviewer characteristics                    | 8        | What characteristics were reported about the interviewer/facilitator? e.g. Bias, assumptions, reasons and interests in the research topic                | Page 11              |
| <b>Domain 2: study design</b>                  |          |                                                                                                                                                          |                      |
| <i>Theoretical framework</i>                   |          |                                                                                                                                                          |                      |
| Methodological orientation and Theory          | 9        | What methodological orientation was stated to underpin the study? e.g. grounded theory, discourse analysis, ethnography, phenomenology, content analysis | Page 5               |
| <i>Participant selection</i>                   |          |                                                                                                                                                          |                      |
| Sampling                                       | 10       | How were participants selected? e.g. purposive, convenience, consecutive, snowball                                                                       | Page 6               |
| Method of approach                             | 11       | How were participants approached? e.g. face-to-face, telephone, mail, email                                                                              | Page 6               |
| Sample size                                    | 12       | How many participants were in the study?                                                                                                                 | Page 7               |
| Non-participation                              | 13       | How many people refused to participate or dropped out? Reasons?                                                                                          | Page 10              |
| <i>Setting</i>                                 |          |                                                                                                                                                          |                      |
| Setting of data collection                     | 14       | Where was the data collected? e.g. home, clinic, workplace                                                                                               | Page 10              |
| Presence of non-participants                   | 15       | Was anyone else present besides the participants and researchers?                                                                                        | Page 10              |
| Description of sample                          | 16       | What are the important characteristics of the sample? e.g. demographic data, date                                                                        | Page 8-9             |

|                                        |    |                                                                                                                                 |                |
|----------------------------------------|----|---------------------------------------------------------------------------------------------------------------------------------|----------------|
| <b>Data collection</b>                 |    |                                                                                                                                 |                |
| Interview guide                        | 17 | Were questions, prompts, guides provided by the authors? Was it pilot tested?                                                   | Page 10        |
| Repeat interviews                      | 18 | Were repeat interviews carried out? If yes, how many?                                                                           | Page 10        |
| Audio/visual recording                 | 19 | Did the research use audio or visual recording to collect the data?                                                             | Page 10        |
| Field notes                            | 20 | Were field notes made during and/or after the interview or focus group?                                                         | Not applied    |
| Duration                               | 21 | What was the duration of the interviews or focus group?                                                                         | Page 10        |
| Data saturation                        | 22 | Was data saturation discussed?                                                                                                  | Page 7         |
| Transcripts returned                   | 23 | Were transcripts returned to participants for comment and/or correction?                                                        | Page 10        |
| <b>Domain 3: analysis and findings</b> |    |                                                                                                                                 |                |
| <b>Data analysis</b>                   |    |                                                                                                                                 |                |
| Number of data coders                  | 24 | How many data coders coded the data?                                                                                            | Page 10 and 25 |
| Description of the coding tree         | 25 | Did authors provide a description of the coding tree?                                                                           | Page N/A       |
| Derivation of themes                   | 26 | Were themes identified in advance or derived from the data?                                                                     | Page 12        |
| Software                               | 27 | What software, if applicable, was used to manage the data?                                                                      | Not applied    |
| Participant checking                   | 28 | Did participants provide feedback on the findings?                                                                              | Page 7         |
| <b>Reporting</b>                       |    |                                                                                                                                 |                |
| Quotations presented                   | 29 | Were participant quotations presented to illustrate the themes/findings? Was each quotation identified? e.g. participant number | Page 11-20     |
| Data and findings consistent           | 30 | Was there consistency between the data presented and the findings?                                                              | Page 10-20     |
| Clarity of major themes                | 31 | Were major themes clearly presented in the findings?                                                                            | Page 12        |
| Clarity of minor themes                | 32 | Is there a description of diverse cases or discussion of minor themes?                                                          | Not applied    |
